# Supplementary material for: The postnatal leptin surge in mice is variable in both time and intensity and reflects nutritional status
Source: PubMed Central journal article supplement (PMC8748198; doi:10.1038/s41366-021-00957-5), 2021-09-02
Supplement: 41366_2021_957_MOESM1_ESM.pdf [file 41366_2021_957_MOESM1_ESM.pdf]

**The postnatal leptin surge in mice is variable in both time and intensity and reflects nutritional status.**

**Manuscript Number: 2021IJO00149.**

Alicja A. Skowronski<sup>1</sup>, Evan D. Shaulson<sup>1</sup>, Rudolph L. Leibel<sup>1,2</sup>, Charles A. LeDuc<sup>1,2\*</sup>

<sup>1</sup>*Division of Molecular Genetics, Department of Pediatrics, Vagelos College of Physicians and Surgeons, Columbia University Irving Medical Center, New York, NY 10032, USA.*

<sup>2</sup>*Naomi Berrie Diabetes Center, Columbia University Irving Medical Center, New York, NY 10032, USA.*

### **Supplementary Material**

*Supplementary figure and table legends*

**Fig. S1.** Over- and undernutrition effects on mean plasma leptin concentrations during the first 4 weeks of life in females (A) compared to males (B). (C) AUC for plasma leptin for each sex. Differences in leptin concentration AUC among the groups were tested using two-way ANOVA with Sidak post hoc testing at the 5% level of significance; ns denotes non-significant difference. Means shown with  $\pm$  SEM.

**Fig. S2.** Body weight (A), body fat (B) and lean mass (C) in the replication cohort of mixed sexes pups raised in small (SL; 3 pups per dam; orange), normal (NL; 7-8 pups per dam; gray), and large (LL; 11-12 pups per dam; blue) litters that were monitored over the first 4 weeks of life and bled once per week. GEE analysis performed to compare changes in body weight and

composition during the pre-weaning period while pups were in their respective litter size groups; statistics in supplementary Table 3. Different lowercase letters indicate significant difference by the Wald Chi-Square test at the 5% level of significance. Data shown as mean  $\pm$  SEM.

**Fig. S3.** Maternal HFD-feeding effects on mean plasma leptin concentrations during the first 4 weeks of life in females (A) compared to males (B). (C) AUC for plasma leptin for each sex. Differences in leptin concentration AUCs among the groups were tested using two-way ANOVA with Sidak post hoc testing at the 5% level of significance; ns denotes non-significant difference. Means shown with  $\pm$  SEM.

**Fig. S4.** Over- and undernutrition effects on leptin surge in plasma in the replication cohort bled once per week. (A) Mean plasma leptin concentration, (B) mean leptin concentration AUC over P6-P17, (C) mean leptin concentration AUC over P6-P17 normalized to mean fat mass over that time period, (D) mean peak leptin concentration (peak defined as the maximum leptin concentration measured during the first 4 weeks of postnatal life), (E) mean peak leptin concentration adjusted for body weight and age at which the peak occurred in mixed sexes pups raised in small (SL; 3 pups per dam; orange), normal (NL; 7-8 pups per dam; gray), and large (LL; 11-12 pups per dam; blue) litters that were monitored over the first 4 weeks of life. Differences in leptin AUC and peak leptin concentrations among the groups were tested using one-way ANOVA with Tukey post hoc (or Sidak for ANOVA with covariates) at the 5% level of significance; \* $p < 0.05$ , \*\* $p < 0.01$ , \*\*\* $p < 0.001$ . Means shown with  $\pm$  SEM.

**Fig. S5.** Plasma leptin (A) and relative expression of *Lepr* (B), *Adrb3* (C), *Ucp1* (D), *Hsl* (E), and *Adipoq* (F) in SCAT, PGAT, PR, Mes, iBAT, and aBAT in P10 pups reared in small, normal or large litters. Relative expression was normalized to a housekeeping gene, *Actb*. Differences among the groups were tested with one- or two-way ANOVA with Tukey post hoc testing at the 5% level of significance; \* $p < 0.05$ ; \*\* $p < 0.01$ , \*\*\* $p < 0.001$ . Means shown with  $\pm$  SEM.

**Table S1.** Sequences for primer-probe mixes used for gene expression assays.

**Table S2.** Statistical results of the Generalized Estimating Equation (GEE) used to compare body weight, fat mass and lean mass in the small (SL), normal (NL) and large (LL) litters pups of the primary cohort.

**Table S3.** Statistical results of the Generalized Estimating Equation (GEE) used to compare body weight, fat mass and lean mass in the small (SL), normal (NL) and large (LL) litters pups of the replication cohort.

**Table S4.** Statistical results of the Generalized Estimating Equation (GEE) used to compare body weight, fat mass and lean mass in the pups raised by dams fed HFD at parturition, or for 20 weeks pre-conception, or control dams fed breeder chow during the same periods.

Fig. S1

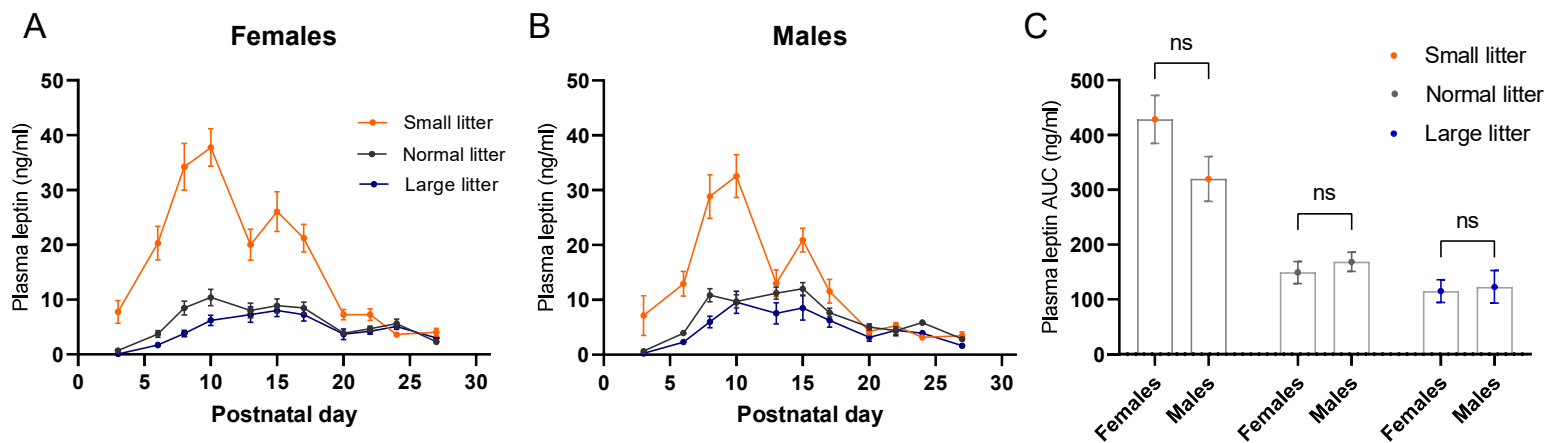

Fig. S2

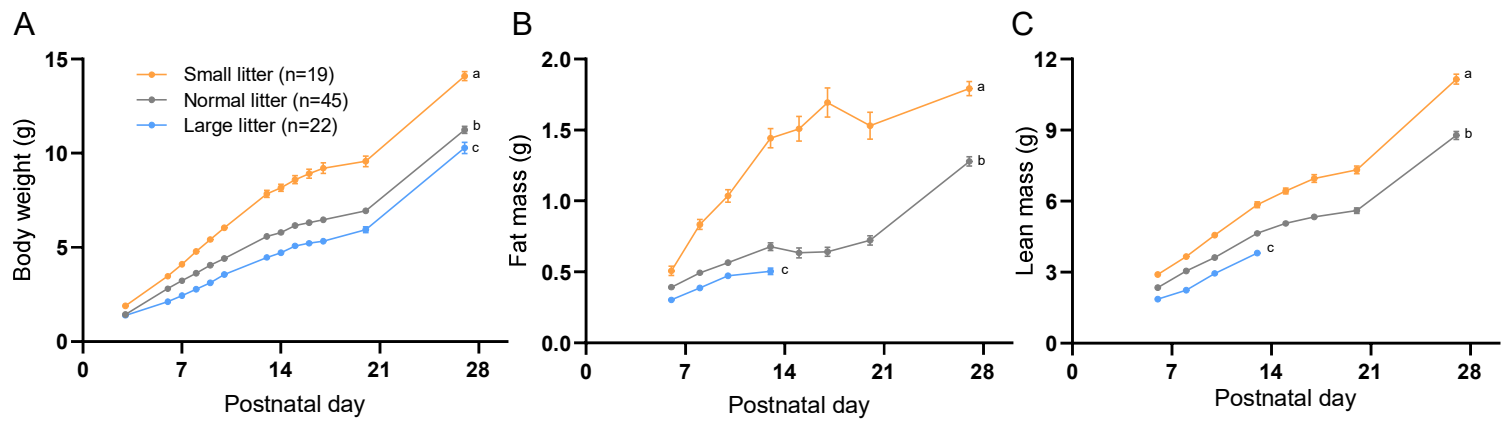

Fig. S3

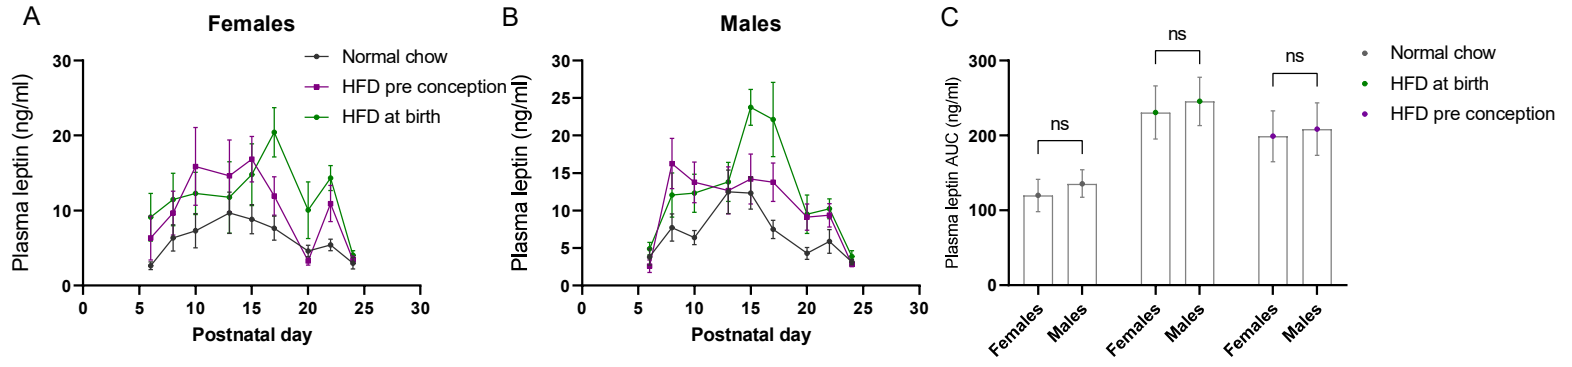

Fig. S4

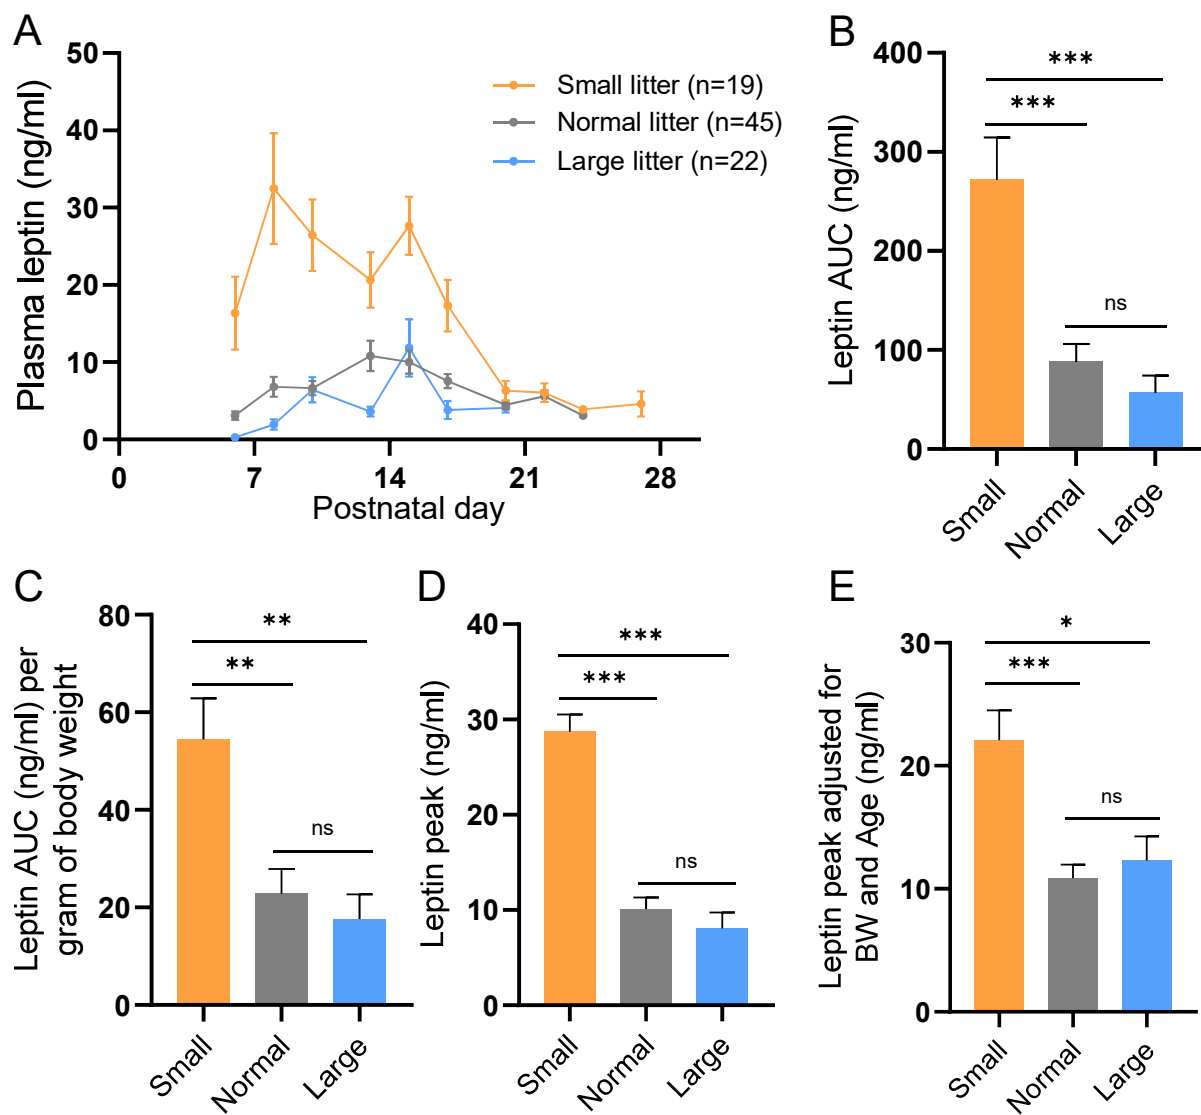

Fig. S5

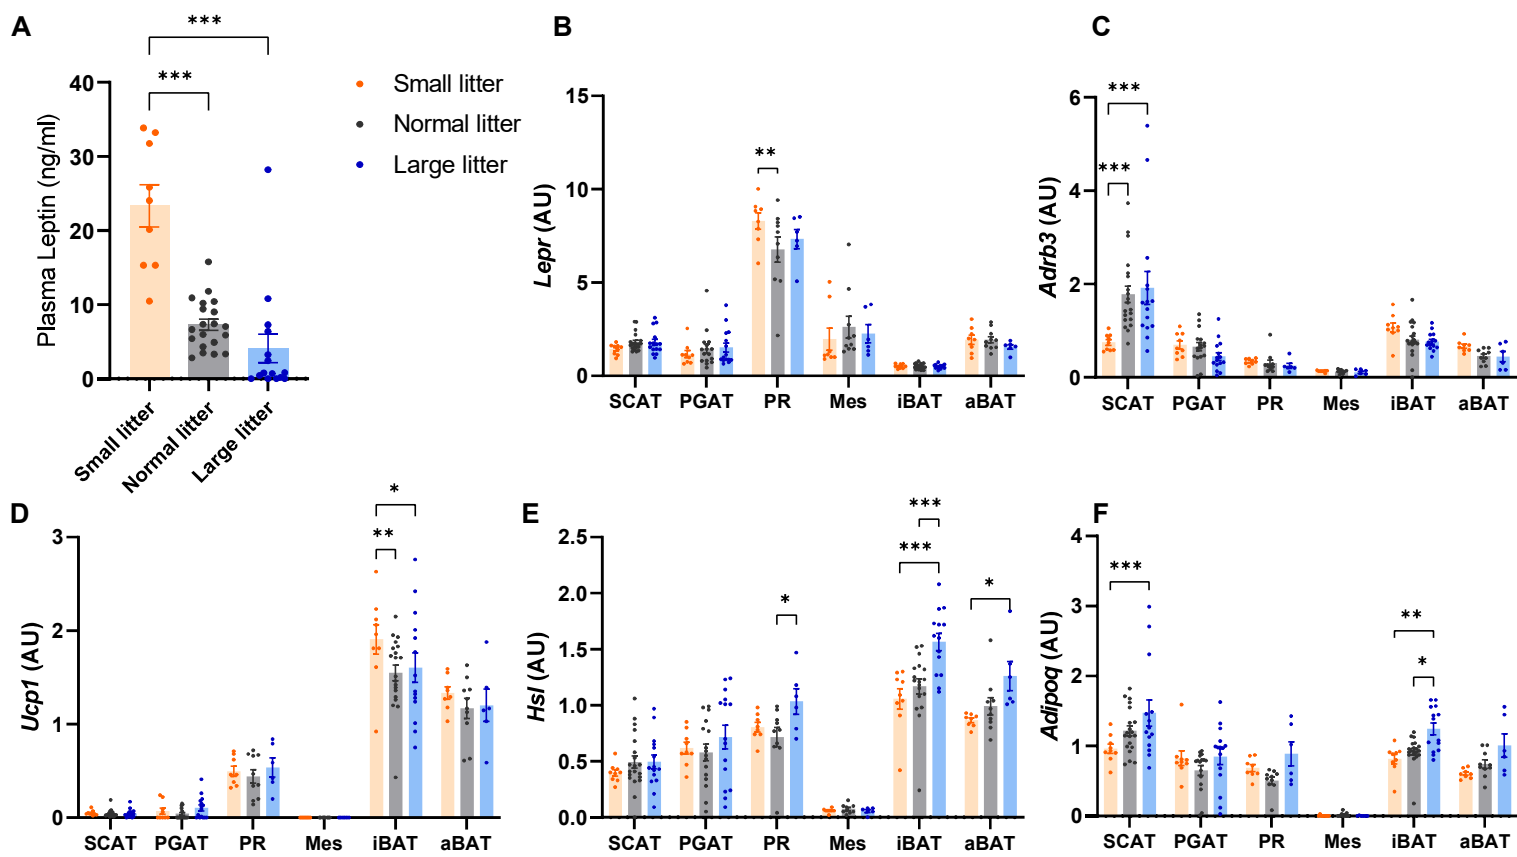



**Supplemental Table 1**

Sequences for primer-probe mixes used for gene expression assays

| Gene          | Sequence |                                                           |
|---------------|----------|-----------------------------------------------------------|
| <i>Actb</i>   | Forward  | GACTCATCGTACTCCTGCTTG                                     |
|               | Reverse  | GATTACTGCTCTGGCTCCTAG                                     |
|               | Probe:   | /5HEX/CTGGCCTCA/ZEN/CTGTCCACCTTCC/3IABkFQ/                |
| <i>Lep</i>    | Forward  | TTCTCCAAGAGCTGCTCC C                                      |
|               | Reverse  | CCTGGTGGCCTTTGAAACTT                                      |
|               | Probe:   | /5Cy5/AAC AGT TGG /TAO/ATG TTA GCC CTG AAT GCT /3IAbRQSp/ |
| <i>Ptgfr</i>  | Forward  | GATCTGATTCCACGTTGCCA                                      |
|               | Reverse  | GCCATAATGTGCGTCTCCT                                       |
|               | Probe:   | /56-FAM/TGGAGTCCC/ZEN/TTTCTGGTAACAATGGC/3IABkFQ/          |
| <i>Ucp1</i>   | Forward  | CACACCTCCAGTCATTAAGCC                                     |
|               | Reverse  | CAAATCAGCTTTGCCTCACTC                                     |
|               | Probe:   | /56-FAM/AAACACCTG/ZEN/CCTCTCTCGGAAACAA/3IABkFQ/           |
| <i>Adrb3</i>  | Forward  | CCAGAAGTCCTGCAAAAACG                                      |
|               | Reverse  | CCACCGCTCAACAGGTTT                                        |
|               | Probe:   | /5Cy5/CCGTGAAGATCCAGCAAGGAAGCT/3IAbRQSp/                  |
| <i>Lepr</i>   | Forward  | GCTCAGACGTAGGATGAATAGATG                                  |
|               | Reverse  | TCACCCAGCACAATCCAAT                                       |
|               | Probe:   | /56-FAM/TGAGGTATC/ZEN/ACAGGCGCAGCC/3IABkFQ/               |
| <i>Lipe</i>   | Forward  | CCATATTGTCTTCTGCGAGTGT                                    |
|               | Reverse  | GGCGAAAAGGCAAGATCAAAG                                     |
|               | Probe:   | /5Cy5/CGTGCGTAAATCCATGCTGTGTGAGA/3IAbRQSp/                |
| <i>Adipoq</i> | Forward  | GCAGGATTAAGAGGAACAGGAG                                    |
|               | Reverse  | TGTCTGTACGATTGTCAGTGG                                     |
|               | Probe:   | /56-FAM/ACGACACCA/ZEN/AAAGGGCTCAGGAT/3IABkFQ/             |

## Supplemental Table 2

Litter size effects on weight and composition of pups in the primary cohort

| Primary Cohort P0-P22      |        | 95% Wald Confidence Interval |        |                 |        |
|----------------------------|--------|------------------------------|--------|-----------------|--------|
| Diet Group * Postnatal Day | Beta   | Lower                        | Upper  | Wald Chi-Square | Sig    |
| <b>Body weight</b>         |        |                              |        |                 |        |
| SL vs NL                   | 0.029  | 0.012                        | 0.046  | 11.614          | 0.001  |
| LL vs NL                   | -0.077 | -0.091                       | -0.064 | 122.086         | <0.001 |
| LL vs SL                   | -0.107 | -0.121                       | -0.092 | 196.400         | <0.001 |
| <b>Fat mass</b>            |        |                              |        |                 |        |
| SL vs NL                   | 0.01   | 0.003                        | 0.017  | 7.56            | 0.006  |
| LL vs NL                   | -0.019 | -0.025                       | -0.013 | 36.310          | <0.001 |
| LL vs SL                   | -0.029 | -0.035                       | -0.022 | 78.972          | <0.001 |
| <b>Lean mass</b>           |        |                              |        |                 |        |
| SL vs NL                   | 0.052  | 0.033                        | 0.07   | 30.483          | <0.001 |
| LL vs NL                   | -0.035 | -0.051                       | -0.02  | 20.136          | <0.001 |
| LL vs SL                   | -0.087 | -0.103                       | -0.071 | 111.650         | <0.001 |

| Primary Cohort P0-P28      |        | 95% Wald Confidence Interval |        |                 |        |
|----------------------------|--------|------------------------------|--------|-----------------|--------|
| Diet Group * Postnatal Day | Beta   | Lower                        | Upper  | Wald Chi-Square | Sig    |
| <b>Body weight</b>         |        |                              |        |                 |        |
| SL vs NL                   | -0.03  | -0.047                       | -0.012 | 11.266          | 0.001  |
| LL vs NL                   | -0.081 | -0.095                       | -0.067 | 122.857         | <0.001 |
| LL vs SL                   | -0.051 | -0.067                       | -0.036 | 42.349          | <0.001 |
| <b>Fat mass</b>            |        |                              |        |                 |        |
| SL vs NL                   | -0.007 | -0.013                       | -0.002 | 6.214           | 0.013  |
| LL vs NL                   | -0.017 | -0.022                       | -0.012 | 42.824          | <0.001 |
| LL vs SL                   | -0.009 | -0.014                       | -0.004 | 12.182          | <0.001 |
| <b>Lean mass</b>           |        |                              |        |                 |        |
| SL vs NL                   | -0.02  | -0.038                       | -0.002 | 4.715           | 0.030  |
| LL vs NL                   | -0.064 | -0.079                       | -0.048 | 64.183          | <0.001 |
| LL vs SL                   | -0.044 | -0.06                        | -0.027 | 27.612          | <0.001 |

### Supplemental Table 3

Litter size effects on weight and composition of pups in the replication cohort

| REPLICATION COHORT<br>Diet Group * Postnatal Day | 95% Wald Confidence Interval |        |        | Wald Chi-Square | Sig    |
|--------------------------------------------------|------------------------------|--------|--------|-----------------|--------|
|                                                  | Beta                         | Lower  | Upper  |                 |        |
| <b>Body weight</b>                               |                              |        |        |                 |        |
| SL vs NL                                         | 0.119                        | 0.104  | 0.134  | 239.917         | <0.001 |
| LL vs NL                                         | -0.026                       | -0.04  | -0.011 | 12.735          | <0.001 |
| LL vs SL                                         | -0.144                       | -0.161 | -0.128 | 284.972         | <0.001 |
| <b>Fat mass</b>                                  |                              |        |        |                 |        |
| SL vs NL                                         | 0.014                        | 0.008  | 0.02   | 21.133          | <0.001 |
| LL vs NL (analysis from P6 to P13)               | -0.011                       | -0.021 | -0.002 | 5.263           | 0.022  |
| LL vs SL (analysis from P6 to P13)               | -0.098                       | -0.112 | -0.085 | 216.282         | <0.001 |
| <b>Lean mass</b>                                 |                              |        |        |                 |        |
| SL vs NL                                         | 0.094                        | 0.077  | 0.11   | 126.988         | <0.001 |
| LL vs NL (analysis from P6 to P13)               | -0.038                       | -0.057 | -0.019 | 15.441          | <0.001 |
| LL vs SL (analysis from P6 to P13)               | -0.16                        | -0.186 | -0.134 | 148.242         | <0.001 |

**Supplemental Table 4**

Maternal high fat diet (HFD) effects on weight and composition of pups

| Diet Group * Postnatal Day         | Beta  | 95% Wald Confidence Interval |       | Wald Chi-Square | Sig    |
|------------------------------------|-------|------------------------------|-------|-----------------|--------|
|                                    |       | Lower                        | Upper |                 |        |
| <b>Body weight</b>                 |       |                              |       |                 |        |
| HFD at parturition vs Control chow | 0.051 | 0.04                         | 0.063 | 75.318          | <0.001 |
| HFD pre-conception vs Control chow | 0.032 | 0.021                        | 0.043 | 31.562          | <0.001 |
| <b>Fat mass</b>                    |       |                              |       |                 |        |
| HFD at parturition vs Control chow | 0.022 | 0.017                        | 0.027 | 81.632          | <0.001 |
| HFD pre-conception vs Control chow | 0.015 | 0.011                        | 0.02  | 44.618          | <0.001 |
| <b>Lean mass</b>                   |       |                              |       |                 |        |
| HFD at parturition vs Control chow | 0.044 | 0.022                        | 0.067 | 14.732          | <0.001 |
| HFD pre-conception vs Control chow | 0.029 | 0.009                        | 0.049 | 8.144           | 0.004  |
